# Supplementary material
Source: Springer Nature journal article supplement (https://www.springermedizin.de/resource/supplementary/12879_2010_1517_MOESM3_ESM.pdf/9442696)

**A.****FLAIR****T1 post-Gadolinium**

Before treatment

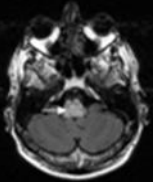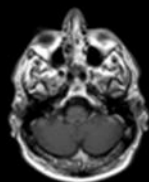

After 18 months of treatment

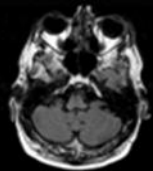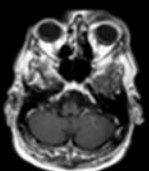

Relapse

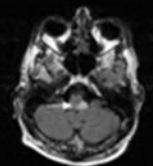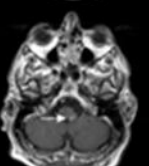

After 17 months of treatment

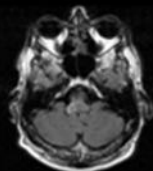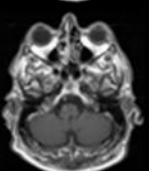**B.****FLAIR****T1 post-Gadolinium**

Before treatment

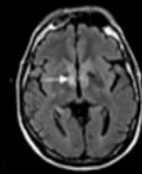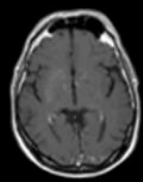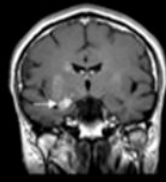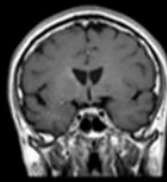

After 18 months of treatment

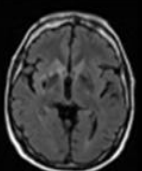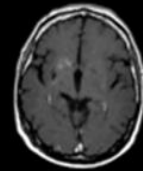

NA

NA

Relapse

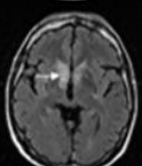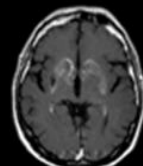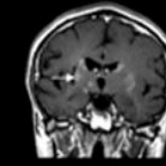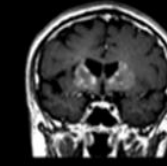

After 17 months of treatment

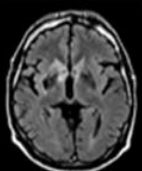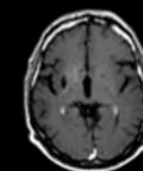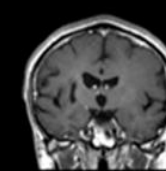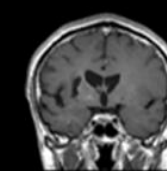

Supplement: MOESM3 [file 9442696]
